# Supplementary material for: Monitoring protease activity in biological tissues using antibody prodrugs as sensing probes
Source: PubMed Central journal article supplement (PMC7125177; doi:10.1038/s41598-020-62339-7), 2020-04-03
Supplement: 41598_2020_62339_MOESM1_ESM.pdf [file 41598_2020_62339_MOESM1_ESM.pdf]

## SUPPLEMENTARY INFORMATION

### **Monitoring protease activity in biological tissues using antibody prodrugs as sensing probes**

Olga Vasiljeva<sup>1\*</sup>, Elizabeth Menendez<sup>1</sup>, Margaret Nguyen<sup>1</sup>, Charles S. Craik<sup>2</sup>, W. Michael Kavanaugh<sup>1</sup>

#### Affiliations:

<sup>1</sup>CytomX Therapeutics, Inc.; 151 Oyster Point Blvd. Suite 400, South San Francisco, California, 94080, USA.

<sup>2</sup>Department of Pharmaceutical Chemistry, University of California, 600 16th Street, San Francisco, CA 94143, USA

\*e-mail: [ovasiljeva@cytomx.com](mailto:ovasiljeva@cytomx.com)

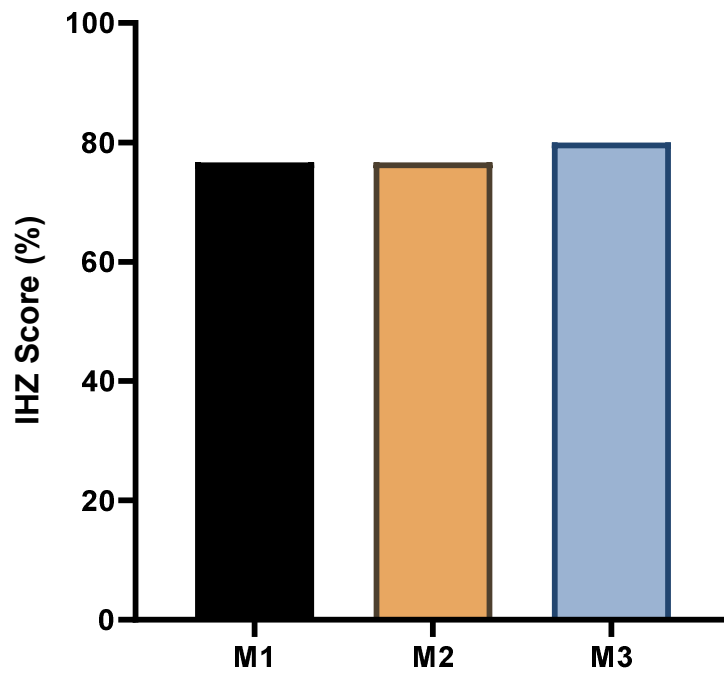

**Supplementary Figure 1.** Probody-S01 IHZ screening of H292 xenograft tumors obtained from three independent H292 xenograft mice demonstrates similar activation profile between assessed tumors.

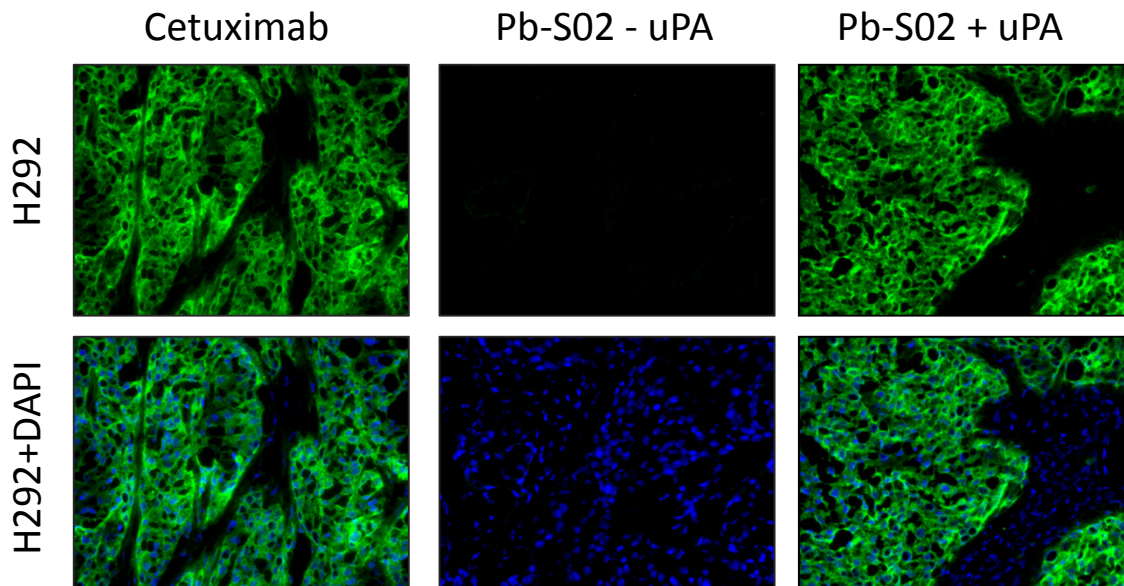

**Supplementary Figure 2.** Probody-S02 IHZ assay in H292 xenograft tumor tissue in the absence and presence of recombinant uPA (staining in green). DAPI nuclear staining appears in blue.

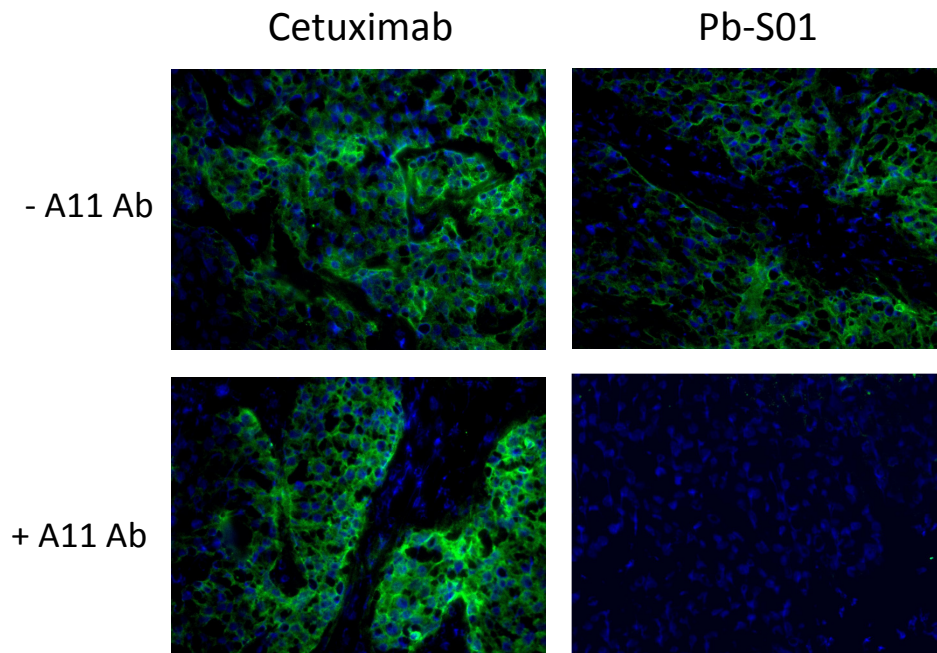

**Supplementary Figure 3.** Inhibition of Probody-S01 IHZ signal (staining in green) by pre-treatment of H292 xenograft tissue with A11 active-site matriptase inhibitory antibody. DAPI nuclear staining appears in blue.

**Supplementary Table 1.** EGFR IHC and Probody-S01 IHZ screening of CRC patient-derived xenograft (PDX) tumor models

| PDX model  | EGFR IHC | Pb-S01 IHZ (%) |
|------------|----------|----------------|
| CRC_PDX-1  | ++       | 100            |
| CRC_PDX-2  | +++      | 90             |
| CRC_PDX-3  | +++      | 65             |
| CRC_PDX-4  | +++      | 90             |
| CRC_PDX-5  | +++      | 90             |
| CRC_PDX-6  | +++      | 80             |
| CRC_PDX-7  | +++      | 70             |
| CRC_PDX-8  | ++       | 85             |
| CRC_PDX-9  | ++       | 90             |
| CRC_PDX-10 | ++       | 90             |
| CRC_PDX-11 | +++      | 100            |
| CRC_PDX-12 | +++      | 90             |
| CRC_PDX-13 | ++       | 95             |
| CRC_PDX-14 | ++       | 90             |
| CRC_PDX-15 | ++       | 75             |

**Supplementary Table 2.** Summary of Probody-S02 and Probody-M02 IHZ screening of TNBC patient samples

| Patient # | Stage | Her-2 neu | ER | PR | Cetuximab | Pb-S02, % | Pb-M02, % |
|-----------|-------|-----------|----|----|-----------|-----------|-----------|
| #1        | IIIA  | 0         | -  | -  | +         | 60        | 40        |
| #2        | IIIB  | 0         | -  | -  | +         | 40        | 50        |
| #3        | IIA   | 0         | -  | -  | ++        | 100       | 95        |
| #4        | IIA   | 0         | -  | -  | +++       | 10        | 85        |
| #5        | IIIA  | 0         | -  | -  | ++        | 65        | 100       |
| #6        | IIA   | 1+        | -  | -  | ++        | 85        | 100       |
| #7        | IIA   | 0         | -  | -  | ++        | 25        | 85        |
| #8        | IIA   | 1+        | -  | -  | +         | 25        | 100       |
| #9        | IIA   | 0         | -  | -  | ++        | 60        | 30        |
